# Supplementary material for: A Novel SCN9A Mutation Responsible for Primary Erythromelalgia and Is Resistant to the Treatment of Sodium Channel Blockers
Source: PubMed Central journal article supplement (PMC3561374; doi:10.1371/journal.pone.0055212), 2013-01-31

# Supplementary

## Figure S6

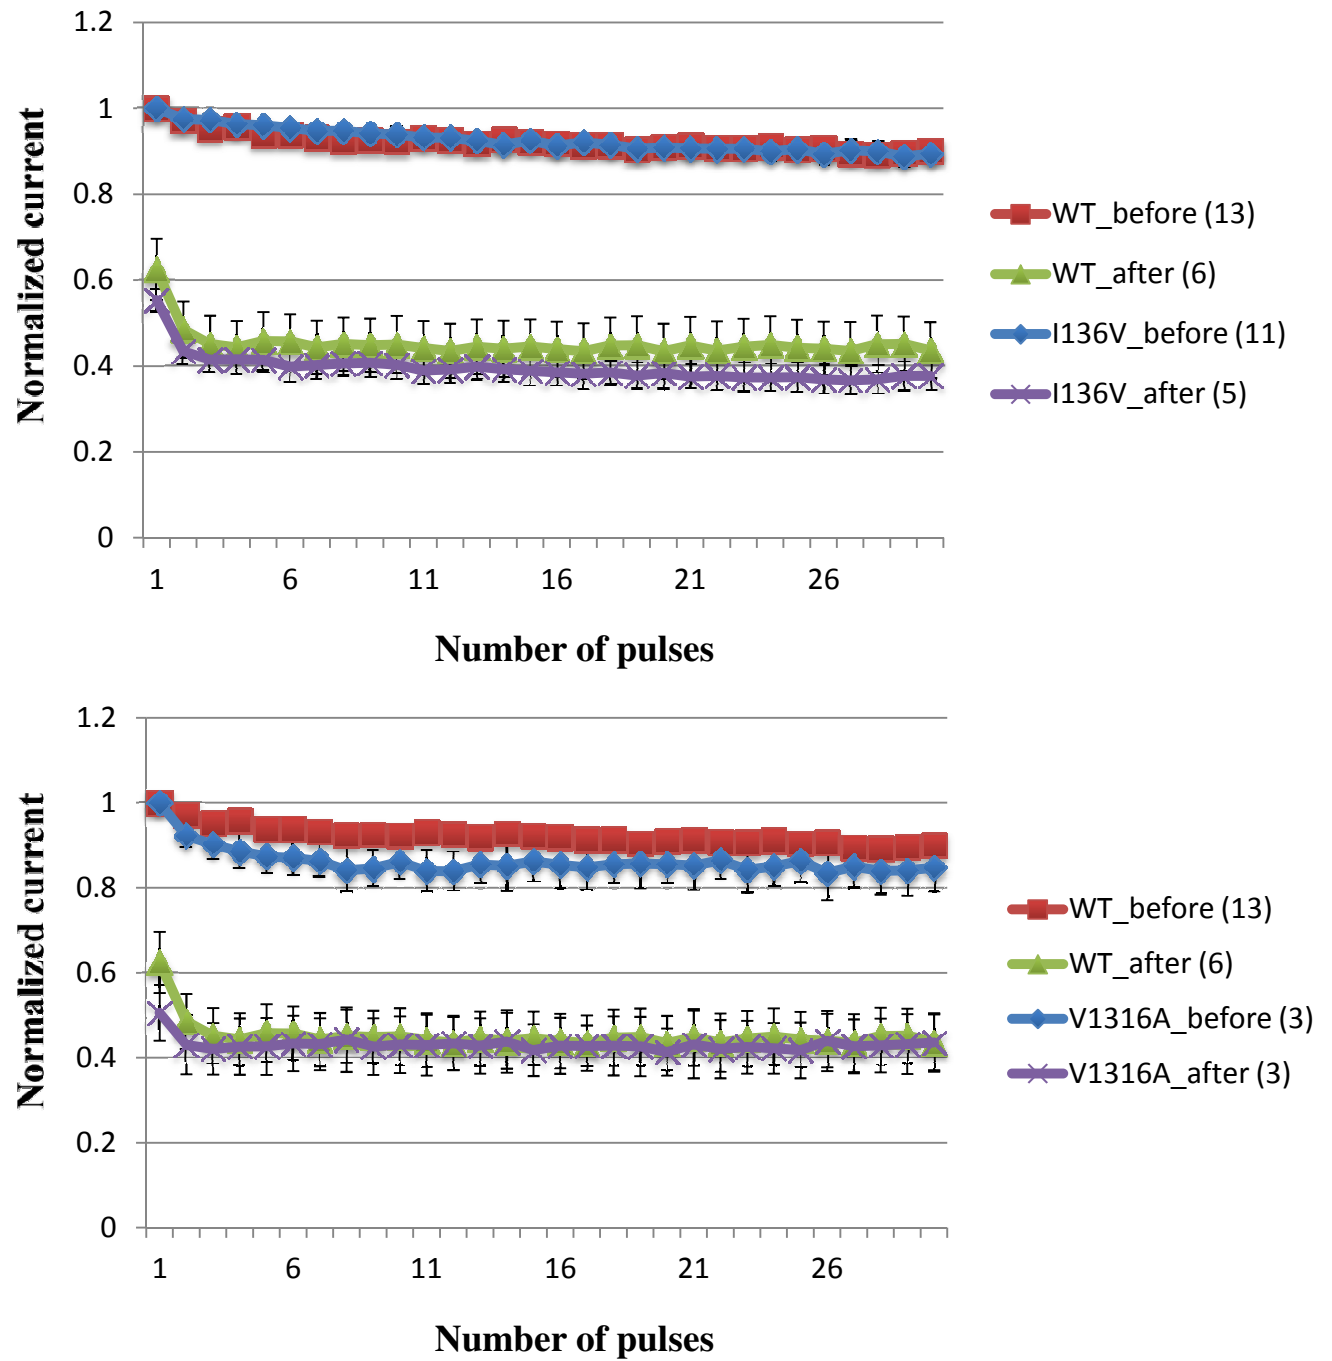

Supplement: pone.0055212.s006.pdf [file pone.0055212.s006.pdf]
